# Supplementary material
Source: publisher figshare collection journal article supplement (https://tandf.figshare.com/ndownloader/files/15124109)
Supplement: Supplementary file 1 [file 15124109]

**Table S1.** Drugs analyzed in oral fluid samples from festival participants (n=1309), cut-off concentrations, and findings.

| **Substance** | **Analytical cutoff in**  **oral fluid-buffer-methanol mixture ng/mL** | **Corresponding cut-off in neat oral fluida**  **ng/mL** | **Prevalence  % (n)** |
| --- | --- | --- | --- |
| ***Illicit substances*** |  |  |  |
| *Cannabis* |  |  |  |
| Tetrahydrocannabinol | 0.047 | 0.37 | 6.0 (78) |
| *Central stimulants* |  |  |  |
| Amphetamine | 1.8 | 15 | 0.5 (7) |
| Methamphetamine | 1.1 | 8.9 | 0.2 (3) |
| Amphetamine or methamphetamine | – | – | 0.7 (9) |
| Cocaine | 0.14 | 1.1 | 2.8 (36) |
| Benzoylecgonineb | 0.54 | 4.3 | 1.4 (18) |
| Cocaine or benzoylecgonine | – | – | 3.2 (42) |
| MDMA (ecstasy) | 0.29 | 2.3 | 2.4 (32) |
| *Illicit opiate* |  |  |  |
| 6-monoacetylmorfin | 0.59 | 4.7 | 0.1 (1)c |
| *Hallucinogen* |  |  |  |
| LSD | 0.0024 | 0.019 | 0.0 (0) |
| *NPSd* |  |  |  |
| 25C-MBOMe | 0.0060 | 0.048 | 0.0 (0) |
| 25I-NBOMe | 0.0077 | 0.062 | 0.0 (0) |
| 2C-B | 0.029 | 0.23 | 0.0 (0) |
| 2C-I | 0.035 | 0.28 | 0.0 (0) |
| 4-methylamphetamine | 0.067 | 0.54 | 0.0 (0) |
| 5F-APINACA | 0.012 | 0.093 | 0.0 (0) |
| 5F-PB-22 | 0.011 | 0.091 | 0.2 (2) |
| Alpha-PVP | 0.016 | 0.13 | 0.0 (0) |
| AM-2201 | 0.011 | 0.087 | 0.1 (1) |
| Diclazepam | 0.024 | 0.19 | 0.0 (0) |
| Dimethyltryptamine | 0.013 | 0.11 | 0.2 (2) |
| Etizolam | 0.027 | 0.22 | 0.1 (1) |
| Ethylphenidate | 0.019 | 0.15 | 0.1 (1) |
| Flubromazepam | 0.025 | 0.20 | 0.0 (0) |
| Flubromazolam | 0.028 | 0.22 | 0.0 (0) |
| Ketamine | 0.043 | 0.34 | 0.2 (2) |
| Methylenedioxypyrovalerone | 0.062 | 0.50 | 0.0 (0) |
| Mephedrone | 0.013 | 0.11 | 0.0 (0) |
| Methiopropamine | 0.011 | 0.087 | 0.0 (0) |
| Salvinorin A | 0.39 | 3.1 | 0.0 (0) |
| THJ-2201 | 0.011 | 0.087 | 0.0 (0) |
| UR-144 | 0.0094 | 0.075 | 0.0 (0) |

(continues next page)

**Table S1 (continued).**

| **Substance** | **Analytical cutoff in**  **oral fluid-buffer-methanol mixture (ng/mL)** | **Corresponding cut-off in neat oral fluida**  **(ng/mL)** | **Prevalence in oral fluid samples  (%)** |
| --- | --- | --- | --- |
| ***Licit substances*** |  |  |  |
| *Opioid analgesics* |  |  |  |
| Buprenorfin | 0.88 | 7.1 | 0.1 (1) |
| Codeine | 0.57 | 4.5 | 0.2 (2) |
| Fentanyl | 0.10 | 0.81 | 0.0 (0) |
| Methadone | 0.58 | 4.7 | 0.0 (0) |
| Morphine | 0.54 | 4.3 | 0.0 (0) |
| Oxycodone | 0.57 | 4.5 | 0.0 (0) |
| Tramadol | 4.0 | 32 | 0.0 (0) |
| *Sedatives and hypnotics* |  |  |  |
| 7-aminoflunitrazepamb | 0.011 | 0.088 | 0.0 (0) |
| 7-aminoclonazepamb | 0.054 | 0.43 | 0.2 (2) |
| 7-aminonitrazepamb | 0.047 | 0.38 | 0.0 (0) |
| Alprazolam | 0.035 | 0.28 | 0.5 (6) |
| Clonazepam | 0.036 | 0.29 | 0.4 (5) |
| Diazepam | 0.026 | 0.21 | 0.2 (2) |
| Flunitrazepam | 0.024 | 0.19 | 0.2 (2) |
| N-desmetyldiazepamb | 0.051 | 0.41 | 0.2 (3) |
| Meprobamate | 1.6 | 13 | 0.0 (0) |
| Nitrazepam | 0.032 | 0.26 | 0.2 (2) |
| Oxazepam | 0.37 | 3.0 | 0.1 (1) |
| Phenazepam | 0.026 | 0.21 | 0.2 (2) |
| Phenobarbital | 1.7 | 14 | 0.0 (0) |
| Zolpidem | 0.010 | 0.083 | 0.2 (3) |
| Zopiclone | 0.073 | 0.59 | 0.8 (10) |

aFor a volume of collected oral fluid of 0.4 mL.
bMetabolites.

cIncluding morphine.
dSubstances classified as NPS in this study.
